# Supplementary material for: Estimating Travel Time for Autonomous Mobile Robots through Long Short-Term Memory
Source: MDPI journal article supplement (doi:10.3390/math11071723), 2023-04-04
Supplement: s1 [file s1]

Spreadsheet S1. Learning Rate.

| Epochs | LR = 0.01 |          | LR = 0.02 |          | LR = 0.03 |          | LR = 0.04 |          | LR = 0.05 |          |
|--------|-----------|----------|-----------|----------|-----------|----------|-----------|----------|-----------|----------|
|        | MAE       | MSE      |
| 1      | 1.686771  | 9.049525 | 1.597718  | 8.791952 | 1.408076  | 7.880785 | 1.469315  | 7.539211 | 1.381861  | 7.597776 |
| 2      | 1.349986  | 7.263715 | 1.355432  | 7.217582 | 1.753536  | 8.02325  | 1.859995  | 8.167907 | 1.525982  | 8.201336 |
| 3      | 1.306907  | 7.314387 | 1.510228  | 7.436864 | 1.500459  | 7.444733 | 1.611041  | 7.679255 | 2.324493  | 11.72478 |
| 4      | 1.39355   | 7.844587 | 1.415631  | 7.753263 | 1.369195  | 7.653821 | 1.606937  | 7.858154 | 1.70424   | 8.149684 |
| 5      | 1.363716  | 7.227499 | 1.515033  | 7.535853 | 1.705931  | 8.380697 | 2.12276   | 10.21109 | 1.989933  | 10.11957 |
| 6      | 1.302081  | 7.260479 | 1.379128  | 7.223499 | 1.387074  | 7.698637 | 1.633281  | 9.247341 | 1.584154  | 8.242172 |
| 7      | 1.335901  | 7.305868 | 1.373256  | 7.356216 | 1.652356  | 8.357008 | 1.488423  | 7.792563 | 2.388028  | 12.66957 |
| 8      | 1.385934  | 7.746908 | 1.394226  | 7.423976 | 1.586577  | 9.137639 | 1.42419   | 7.680138 | 2.174021  | 11.54946 |
| 9      | 1.303864  | 7.274808 | 1.36764   | 7.25983  | 2.092322  | 9.69335  | 1.94695   | 8.910186 | 3.043783  | 16.4667  |
| 10     | 1.321242  | 7.262512 | 1.609117  | 8.40649  | 1.547542  | 8.633998 | 1.967929  | 10.41697 | 2.771473  | 14.95573 |

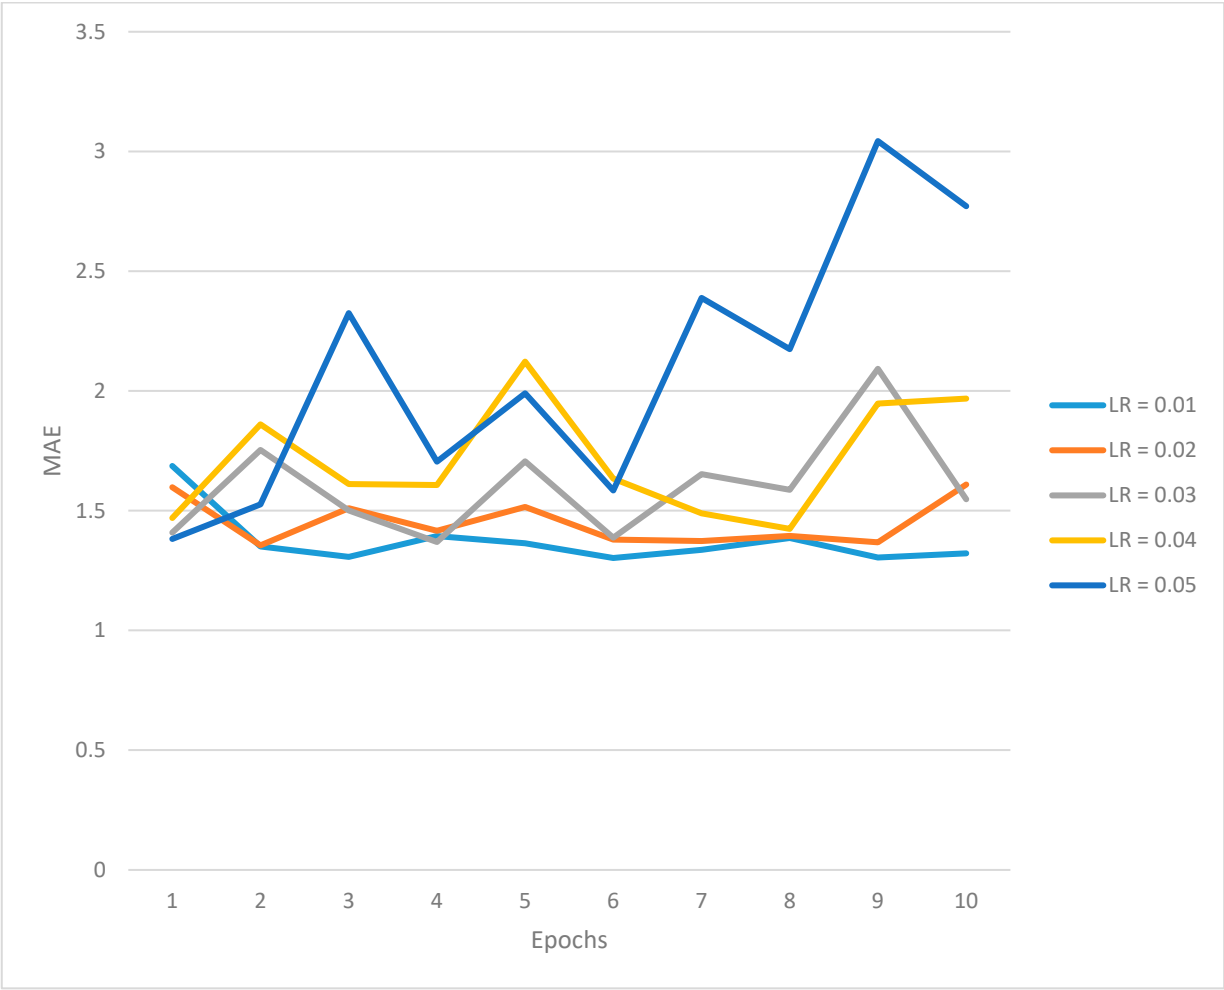

## Spreadsheet S2. Dropout

|        | Dropout 0 % |          | Dropout 1% |          | Dropout 5% |          | Dropout 10 % |          | Dropout 15% |          | Dropout 20% |             | Dropout 25% |          | Dropout 30% |          | Dropout 40% |          | Dropout50% |          |
|--------|-------------|----------|------------|----------|------------|----------|--------------|----------|-------------|----------|-------------|-------------|-------------|----------|-------------|----------|-------------|----------|------------|----------|
| Epochs | MAE         | MSE      | MAE        | MSE      | MAE        | MSE      | MAE          | MSE      | MAE         | MSE      | MAE         | MSE         | MAE         | MSE      | MAE         | MSE      | MAE         | MSE      | MAE        | MSE      |
| 1      | 1.686771    | 9.049525 | 1.480229   | 8.108419 | 1.487194   | 7.970259 | 1.92423      | 8.945499 | 2.264638    | 11.07942 | 2.178904772 | 10.14514446 | 2.338359    | 11.86674 | 2.510149    | 13.19965 | 2.810778    | 15.94929 | 2.190331   | 11.69292 |
| 2      | 1.349986    | 7.263715 | 1.432768   | 7.210764 | 1.655982   | 7.780385 | 2.109151     | 9.52293  | 2.169846    | 9.991771 | 2.311986923 | 11.18597603 | 2.094168    | 9.862114 | 2.444035    | 13.48803 | 2.680563    | 14.80302 | 4.003515   | 32.90007 |
| 3      | 1.306907    | 7.314387 | 1.361022   | 7.423816 | 1.822016   | 9.274536 | 2.737019     | 15.28581 | 2.109854    | 10.28033 | 2.518511057 | 12.52099037 | 2.395331    | 12.49155 | 2.621679    | 13.90858 | 2.285295    | 11.80816 | 2.296496   | 12.30308 |
| 4      | 1.39355     | 7.844587 | 1.464623   | 8.087147 | 1.678928   | 8.872779 | 1.800581     | 8.42853  | 2.342384    | 12.00522 | 2.319530249 | 11.58354187 | 1.786619    | 8.587654 | 2.157405    | 11.41307 | 2.601556    | 14.15332 | 2.786093   | 15.96103 |
| 5      | 1.363716    | 7.227499 | 1.334212   | 7.375373 | 1.743605   | 9.172857 | 2.205978     | 11.81976 | 2.116594    | 10.07291 | 3.151833773 | 18.38983345 | 3.069818    | 17.69684 | 2.644967    | 14.82859 | 3.672518    | 26.5812  | 3.92554    | 26.50223 |
| 6      | 1.302081    | 7.260479 | 1.334628   | 7.479818 | 1.573183   | 7.847444 | 1.929198     | 8.912922 | 2.162135    | 10.46781 | 2.069459677 | 9.448813438 | 2.04195     | 10.11685 | 2.027301    | 10.18613 | 2.679564    | 15.02205 | 2.983681   | 18.53403 |
| 7      | 1.335901    | 7.305868 | 1.37025    | 7.508747 | 1.566364   | 7.579075 | 2.194767     | 11.65123 | 2.428391    | 12.5598  | 2.421570301 | 11.93983555 | 2.398484    | 13.64172 | 2.553256    | 14.42732 | 3.081262    | 18.76183 | 3.229456   | 19.73684 |
| 8      | 1.385934    | 7.746908 | 1.346082   | 7.164536 | 1.797929   | 9.542643 | 1.882839     | 9.385508 | 2.176017    | 10.76966 | 2.181907415 | 10.3900156  | 2.125593    | 10.79191 | 2.542037    | 14.70435 | 2.471328    | 12.71943 | 3.117019   | 18.46549 |
| 9      | 1.303864    | 7.274808 | 1.403416   | 7.401682 | 1.867932   | 9.098566 | 1.935152     | 9.350772 | 2.275062    | 11.43456 | 2.565845013 | 13.66019535 | 1.937257    | 8.933779 | 2.453603    | 12.99916 | 2.485584    | 13.3192  | 3.876992   | 26.09013 |
| 10     | 1.321242    | 7.262512 | 1.413028   | 7.890638 | 1.857703   | 10.61233 | 2.208585     | 10.57364 | 2.578707    | 14.4646  | 2.902745724 | 16.14343643 | 2.51352     | 15.37241 | 2.660163    | 15.00468 | 3.596189    | 24.29347 | 3.207304   | 18.62053 |

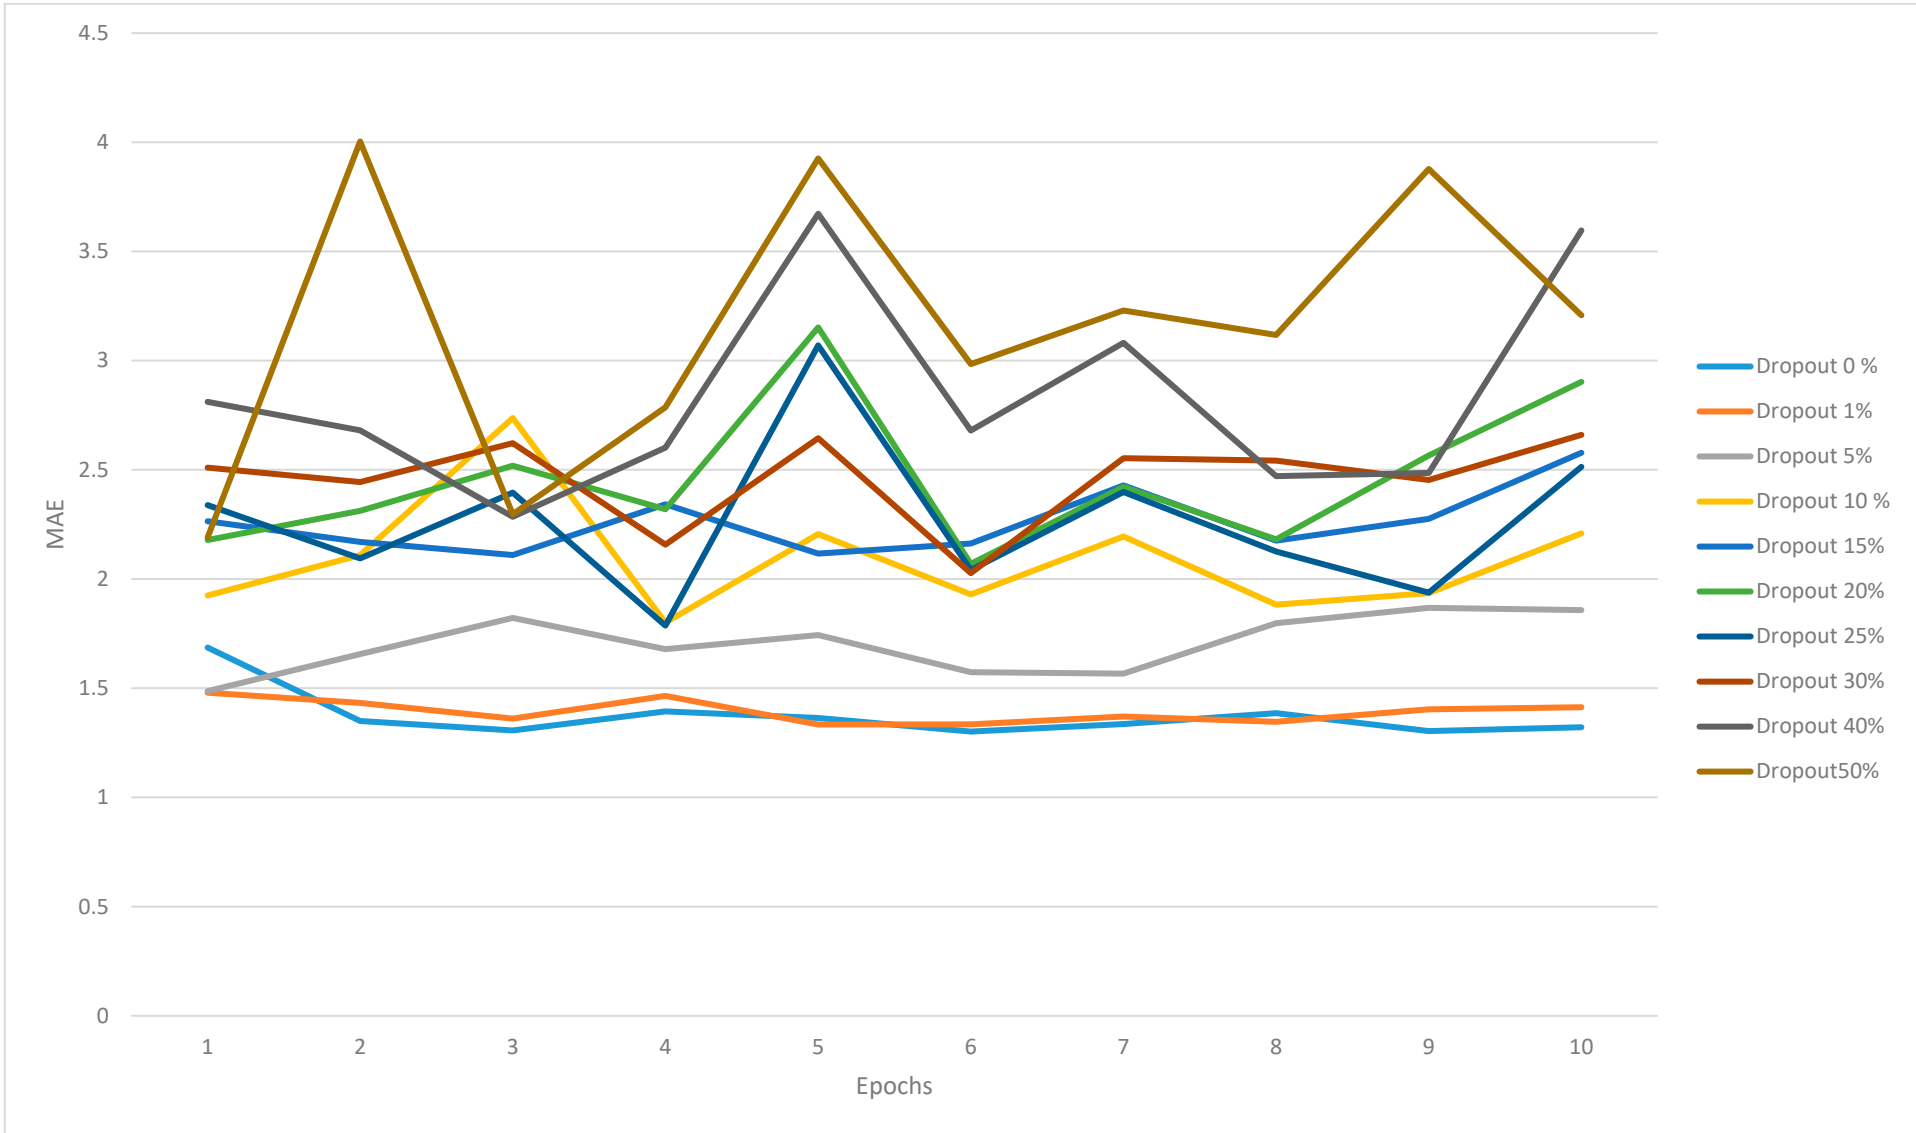

Spreadsheet S3. Layer 2 - No. of LSTM units.

| Epochs | 5 Neurons |          | 10 Neurons  |             | 15 Neurons |          | 20 Neurons |          | 25 Neurons |          | 30 Neurons |          | 40 Neurons |          | 50 Neurons |          | 75 Neurons |          | 100 Neurons |          |
|--------|-----------|----------|-------------|-------------|------------|----------|------------|----------|------------|----------|------------|----------|------------|----------|------------|----------|------------|----------|-------------|----------|
|        | MAE       | MSE      | MAE         | MSE         | MAE        | MSE      | MAE        | MSE      | MAE        | MSE      | MAE        | MSE      | MAE        | MSE      | MAE        | MSE      | MAE        | MSE      | MAE         | MSE      |
| 1      | 1.703483  | 9.734778 | 1.393510818 | 7.792140961 | 1.432488   | 7.963754 | 1.41702    | 7.691566 | 1.409087   | 7.296659 | 1.783661   | 9.674163 | 1.396471   | 7.374694 | 1.323207   | 7.260823 | 1.412157   | 7.541549 | 1.469984    | 7.563497 |
| 2      | 1.373143  | 7.08982  | 1.347898126 | 7.376349449 | 1.370148   | 7.30751  | 1.564963   | 7.532172 | 1.631721   | 7.837942 | 1.350191   | 7.222903 | 1.354994   | 7.303328 | 1.392673   | 7.214513 | 1.423127   | 7.2918   | 1.385193    | 7.372196 |
| 3      | 1.325062  | 7.065048 | 1.347669005 | 7.242846012 | 1.350347   | 7.220499 | 1.315697   | 7.272418 | 1.328304   | 7.228276 | 1.32274    | 7.32061  | 1.311353   | 7.399015 | 1.339468   | 7.067644 | 1.3347     | 7.159493 | 1.382673    | 7.661005 |
| 4      | 1.600131  | 8.973439 | 1.533232808 | 8.595369339 | 1.517105   | 8.54963  | 1.595318   | 8.96007  | 1.340922   | 7.374677 | 1.487561   | 8.055262 | 1.427799   | 8.19763  | 1.324685   | 7.467061 | 1.386287   | 7.915722 | 1.478356    | 8.230546 |
| 5      | 1.314885  | 7.32285  | 1.67605865  | 8.283966064 | 1.298346   | 7.237145 | 1.396329   | 7.408485 | 1.797194   | 8.324821 | 1.412585   | 8.568752 | 1.375912   | 7.390156 | 1.396013   | 7.780433 | 1.32996    | 7.275451 | 1.326851    | 7.453672 |
| 6      | 1.304279  | 7.271808 | 1.45420742  | 7.911408901 | 1.319007   | 6.778543 | 1.319122   | 7.390681 | 1.321087   | 7.149768 | 1.295627   | 6.977911 | 1.326167   | 7.467103 | 2.56534    | 36.97239 | 1.31216    | 7.185224 | 1.32876     | 7.234543 |
| 7      | 1.332952  | 7.45586  | 1.607902408 | 7.699299335 | 1.299248   | 6.830578 | 1.332074   | 7.416147 | 1.612524   | 8.05268  | 1.386023   | 7.620481 | 1.356417   | 7.482643 | 1.32688    | 7.385297 | 1.314775   | 7.332701 | 1.364682    | 7.273904 |
| 8      | 1.413174  | 7.938754 | 1.551005125 | 8.465976715 | 1.310833   | 7.227767 | 1.408415   | 7.970276 | 1.474353   | 8.354515 | 1.329012   | 7.283889 | 1.334337   | 7.149654 | 1.365189   | 7.670633 | 1.427449   | 7.840269 | 1.322352    | 7.18197  |
| 9      | 1.334507  | 7.609381 | 1.515984058 | 7.67696476  | 1.299754   | 7.442302 | 1.33426    | 7.501112 | 1.417328   | 8.068422 | 1.315859   | 7.297921 | 1.325246   | 7.424098 | 1.312215   | 7.248798 | 1.364135   | 6.914255 | 1.347663    | 7.128901 |
| 10     | 1.366445  | 7.773161 | 1.463036656 | 12.10549736 | 1.315903   | 6.86656  | 1.352706   | 7.309    | 1.717099   | 9.427302 | 1.332975   | 7.977637 | 1.341718   | 7.215495 | 1.330506   | 7.307724 | 1.308207   | 7.3599   | 1.34803     | 7.378022 |

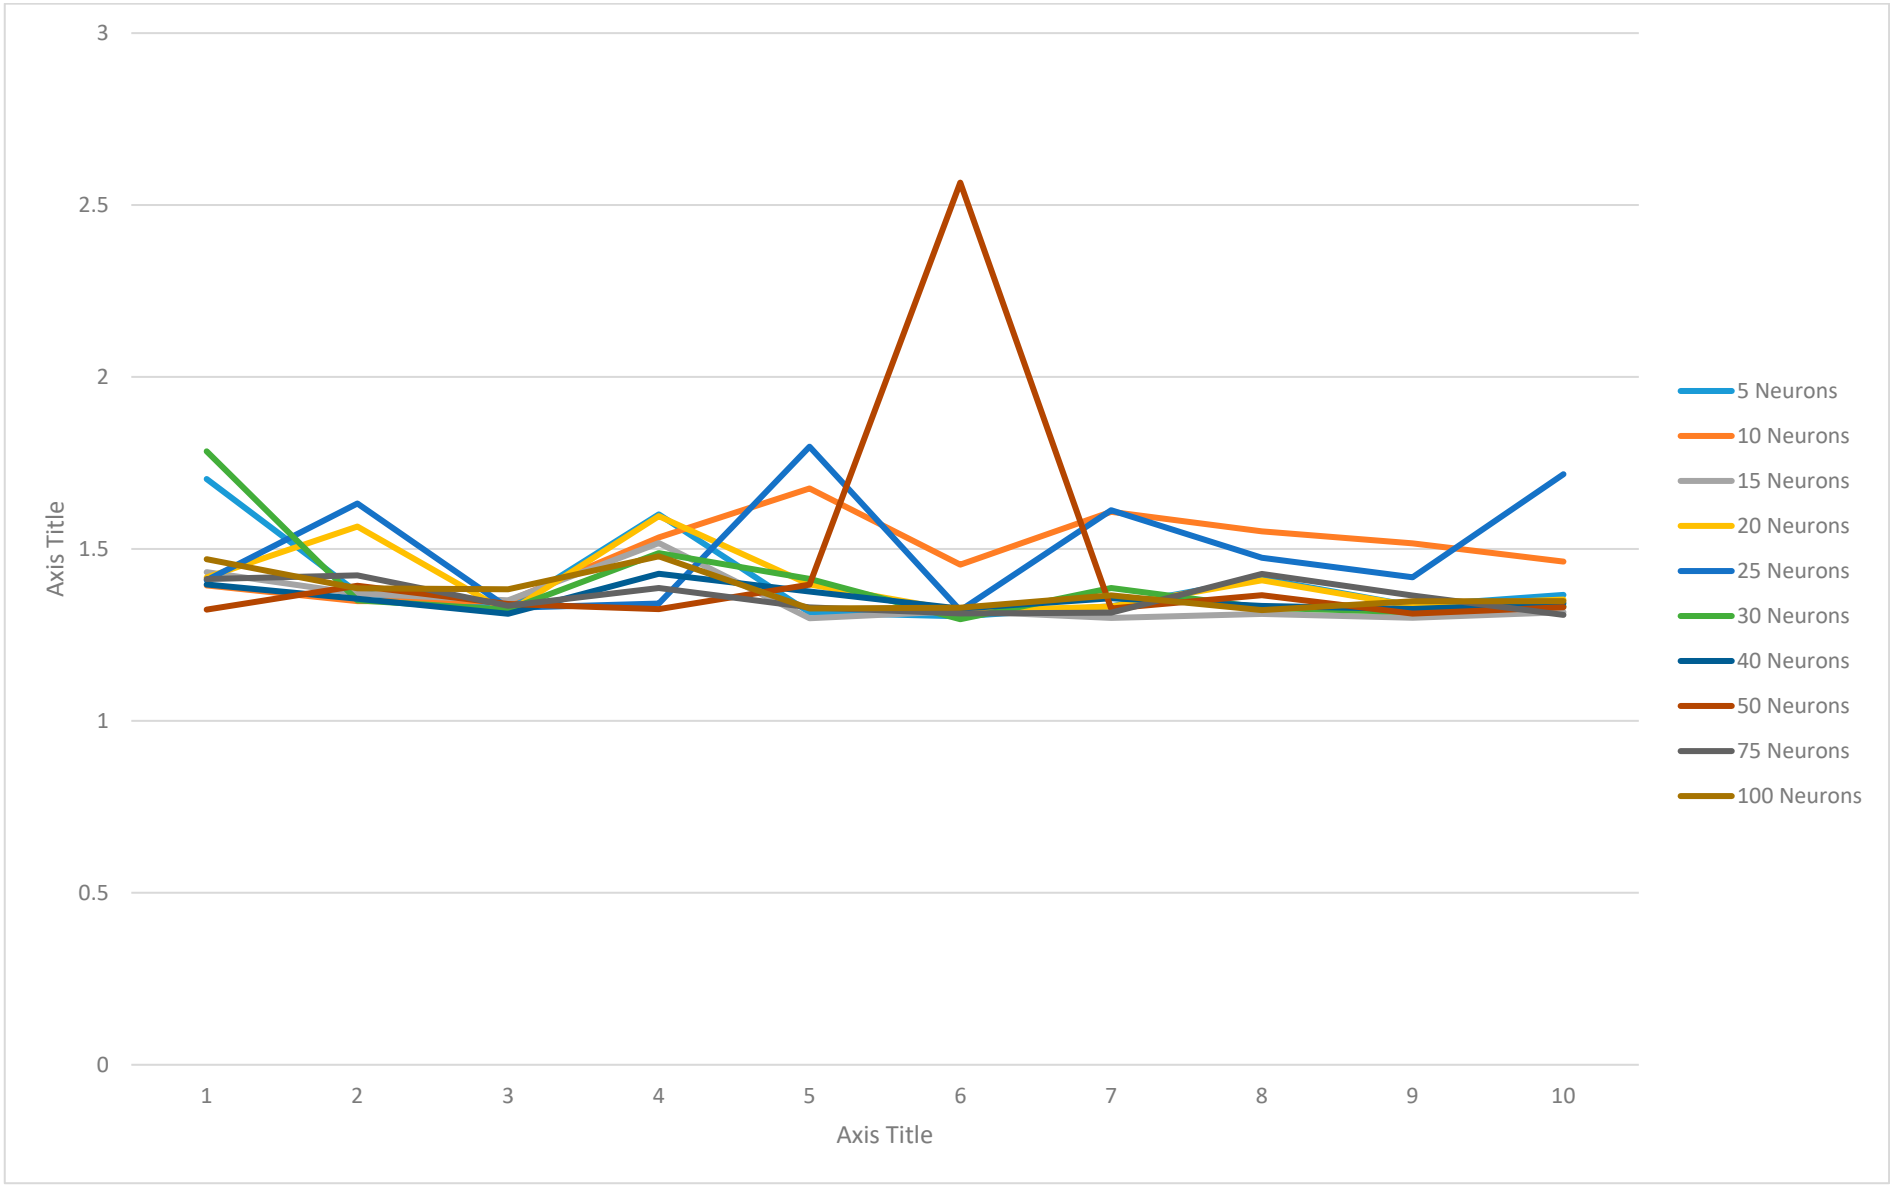

Spreadsheet S4. Optimizer.

| Epochs | Adam     |          | Adamax   |          | Adadelta |          | RMSProp  |          | Nadam    |          | SGD      |          |
|--------|----------|----------|----------|----------|----------|----------|----------|----------|----------|----------|----------|----------|
|        | MAE      | MSE      |
| 1      | 1.686771 | 9.049525 | 1.428415 | 7.989122 | 6.351904 | 78.33114 | 1.423552 | 7.852836 | 1.46619  | 8.187849 | 1.766127 | 9.378208 |
| 2      | 1.349986 | 7.263715 | 1.405243 | 7.199185 | 3.89247  | 35.42682 | 1.334317 | 7.373376 | 1.401163 | 7.352587 | 1.565363 | 7.718357 |
| 3      | 1.306907 | 7.314387 | 1.294369 | 7.103366 | 3.283759 | 26.10395 | 1.369283 | 7.052558 | 1.329677 | 7.140164 | 1.523696 | 7.941309 |
| 4      | 1.39355  | 7.844587 | 1.392769 | 7.84486  | 2.808738 | 19.92786 | 1.317758 | 7.276518 | 1.335846 | 7.579275 | 1.440489 | 7.540804 |
| 5      | 1.363716 | 7.227499 | 1.34718  | 7.639829 | 2.404599 | 15.04609 | 1.436272 | 7.365022 | 1.394557 | 7.373302 | 1.509443 | 7.459907 |
| 6      | 1.302081 | 7.260479 | 1.282123 | 7.153187 | 2.056507 | 11.59611 | 1.325451 | 7.33127  | 1.295792 | 7.309168 | 1.468333 | 7.599711 |
| 7      | 1.335901 | 7.305868 | 1.334169 | 6.950978 | 1.776323 | 9.57458  | 1.35896  | 7.078511 | 1.360619 | 7.5649   | 1.382241 | 7.033111 |
| 8      | 1.385934 | 7.746908 | 1.32553  | 7.27003  | 1.596825 | 8.584287 | 1.362429 | 7.334821 | 1.338881 | 7.606427 | 1.393568 | 7.311974 |
| 9      | 1.303864 | 7.274808 | 1.298376 | 7.063101 | 1.501086 | 8.140914 | 1.629008 | 7.740547 | 1.360352 | 7.116661 | 1.464886 | 7.390286 |
| 10     | 1.321242 | 7.262512 | 1.329569 | 7.038637 | 1.448685 | 7.933127 | 1.401889 | 7.923148 | 1.349861 | 7.449963 | 1.557611 | 8.469942 |

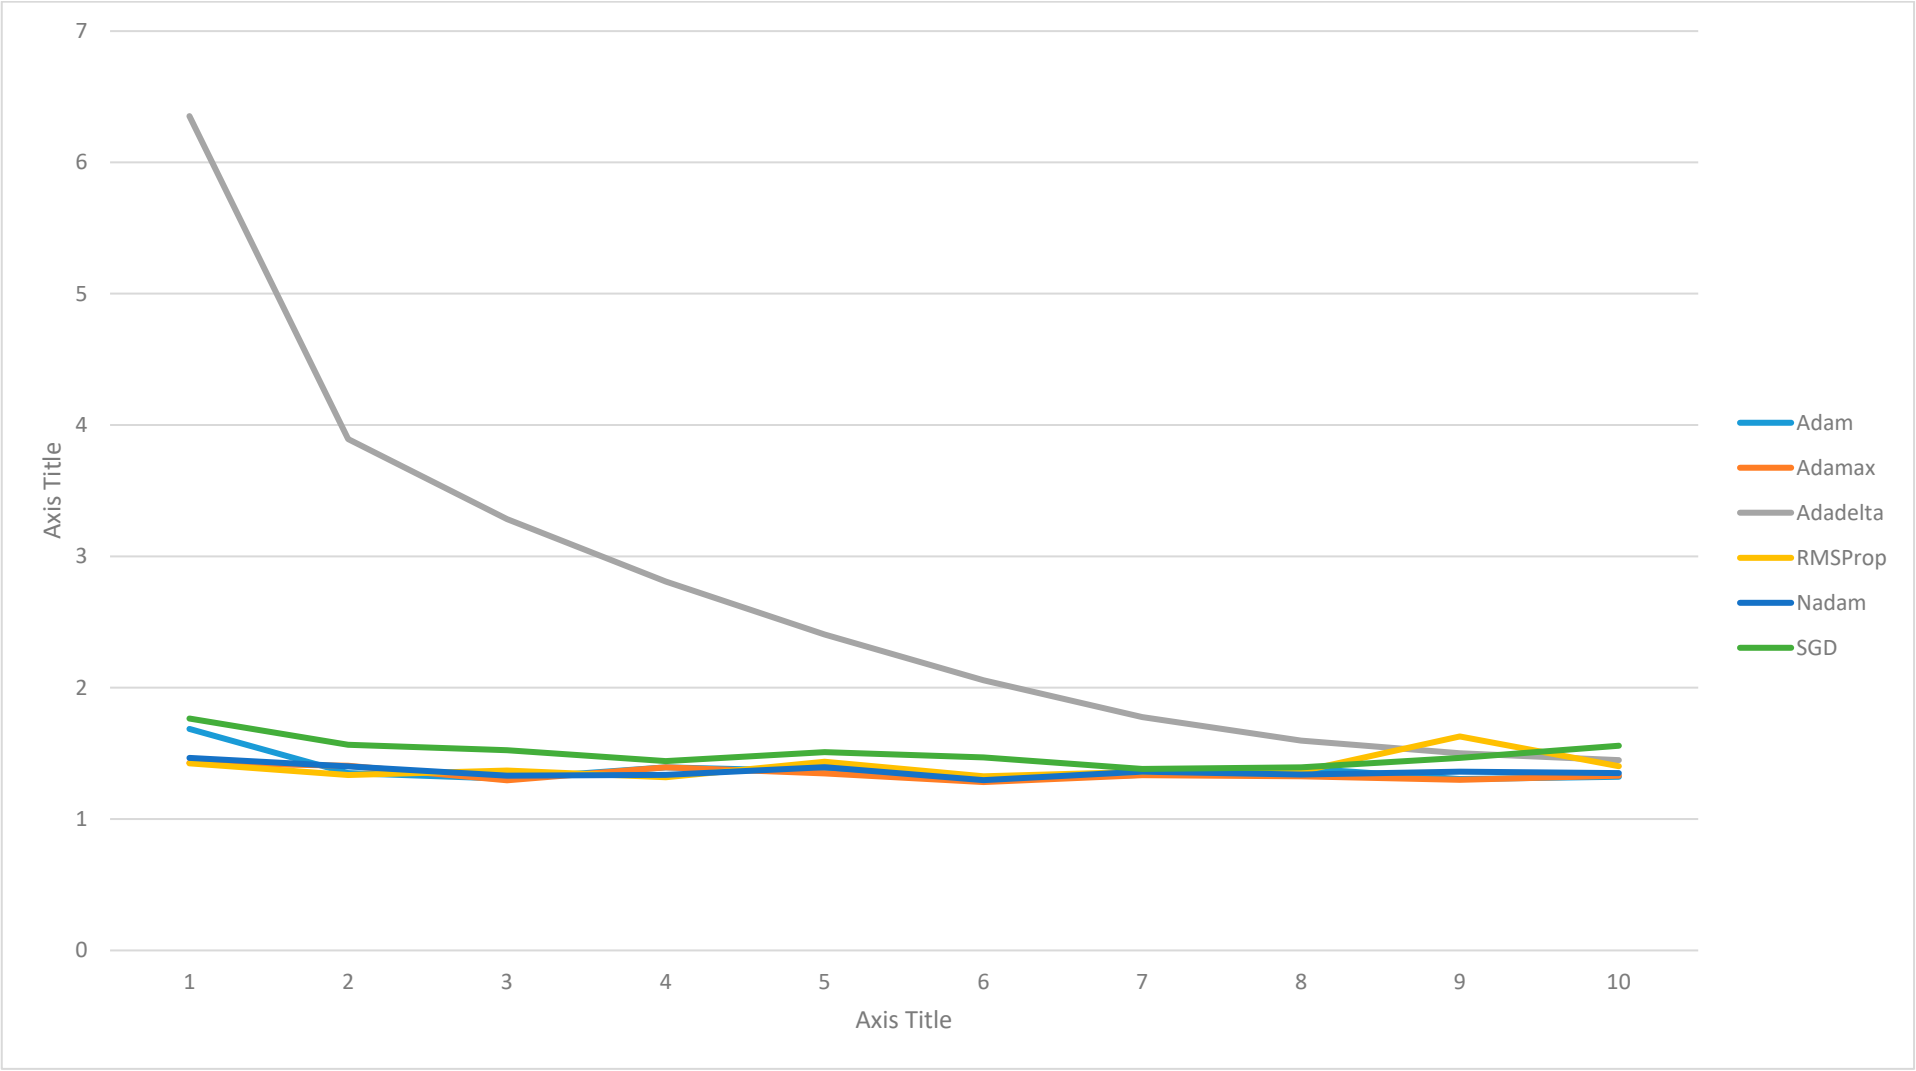

Spreadsheet S5. Lidar scan interval.

| Epochs | No LiDAR data |          | Every 72° |          | Every 36° |          | Every 24° |          | Every 18° |          | Every 1° |          |
|--------|---------------|----------|-----------|----------|-----------|----------|-----------|----------|-----------|----------|----------|----------|
|        | SI = 0        |          | SI = 5    |          | SI = 10   |          | SI = 15   |          | SI = 20   |          | SI = 360 |          |
|        | MAE           | MSE      | MAE       | MSE      | MAE       | MSE      | MAE       | MSE      | MAE       | MSE      | MAE      | MSE      |
| 1      | 1.428415      | 7.989122 | 1.54137   | 14.09972 | 1.513803  | 9.856539 | 1.537856  | 10.13486 | 1.461666  | 9.11749  | 1.921599 | 12.12894 |
| 2      | 1.405243      | 7.199185 | 1.544425  | 14.01416 | 1.56258   | 10.8084  | 1.433151  | 9.883222 | 1.412032  | 8.701735 | 1.634161 | 11.49021 |
| 3      | 1.294369      | 7.103366 | 1.510581  | 14.44448 | 1.440246  | 9.715917 | 1.433497  | 9.698186 | 1.397116  | 8.349157 | 1.6931   | 11.22733 |
| 4      | 1.392769      | 7.84486  | 1.493591  | 13.96265 | 1.593415  | 10.98417 | 1.348185  | 9.44203  | 1.417689  | 8.085324 | 1.67066  | 11.18706 |
| 5      | 1.34718       | 7.639829 | 1.567761  | 13.65187 | 1.408633  | 9.453311 | 1.397048  | 9.263516 | 1.350086  | 8.362681 | 1.588874 | 10.816   |
| 6      | 1.282123      | 7.153187 | 1.527727  | 14.36185 | 1.372339  | 9.53743  | 1.386795  | 9.134673 | 1.357405  | 8.341281 | 1.688432 | 11.184   |
| 7      | 1.334169      | 6.950978 | 1.624745  | 13.58902 | 1.428201  | 10.07707 | 1.377527  | 9.793842 | 1.398037  | 8.233082 | 1.80792  | 11.05619 |
| 8      | 1.32553       | 7.27003  | 1.496335  | 14.0712  | 1.400161  | 9.497207 | 1.312283  | 9.232319 | 1.506503  | 8.238437 | 1.611528 | 11.38099 |
| 9      | 1.298376      | 7.063101 | 1.490323  | 13.8522  | 1.418742  | 9.337    | 1.348888  | 9.229536 | 1.420594  | 8.854557 | 1.619877 | 11.06245 |
| 10     | 1.329569      | 7.038637 | 1.489086  | 14.17969 | 1.416156  | 9.684049 | 1.332653  | 9.040174 | 1.336336  | 8.315422 | 1.650217 | 10.84208 |

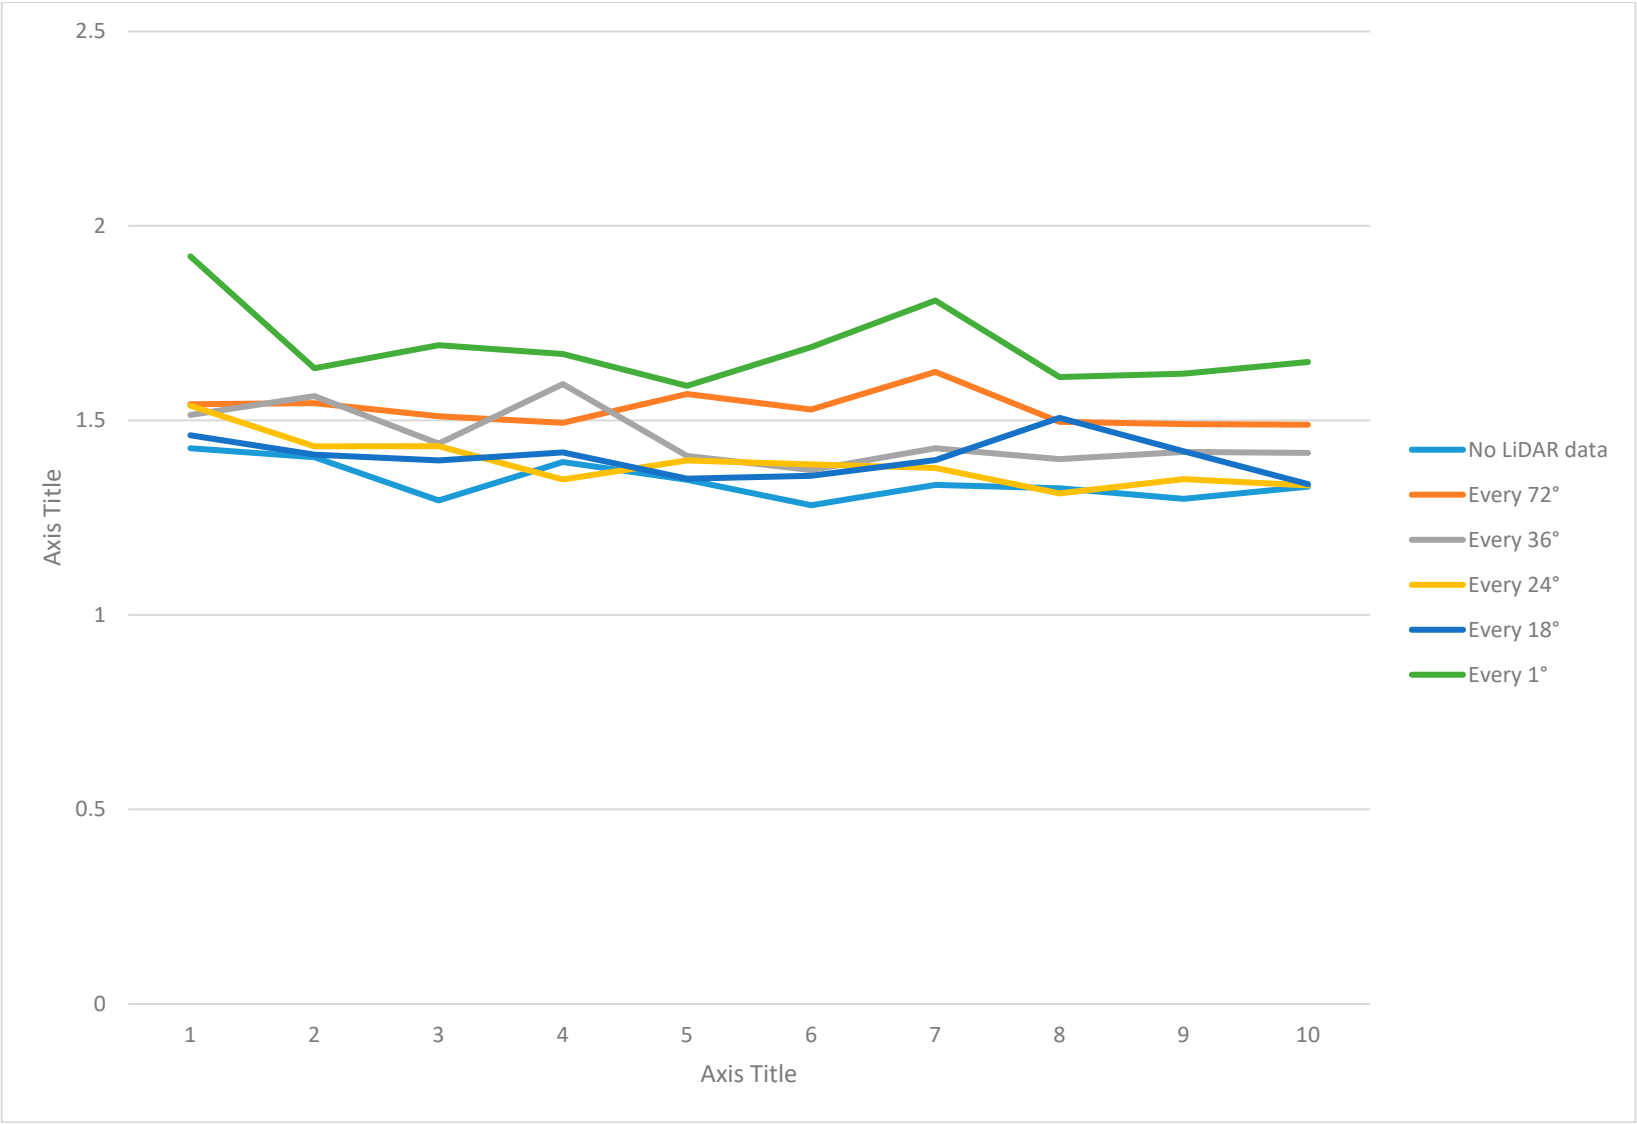

Spreadsheet S6. Final model results.

| Epochs | MAE      | MSE      |
|--------|----------|----------|
| 1      | 1.428415 | 7.989122 |
| 2      | 1.405243 | 7.199185 |
| 3      | 1.294369 | 7.103366 |
| 4      | 1.392769 | 7.84486  |
| 5      | 1.34718  | 7.639829 |
| 6      | 1.282123 | 7.153187 |
| 7      | 1.334169 | 6.950978 |
| 8      | 1.32553  | 7.27003  |
| 9      | 1.298376 | 7.063101 |
| 10     | 1.329569 | 7.038637 |
| 11     | 1.290353 | 7.18541  |
| 12     | 1.284716 | 6.998314 |
| 13     | 1.286337 | 6.955005 |
| 14     | 1.293561 | 7.425424 |
| 15     | 1.31213  | 7.225727 |
| 16     | 1.308778 | 7.425049 |
| 17     | 1.280285 | 7.054379 |
| 18     | 1.283184 | 7.042294 |
| 19     | 1.283146 | 7.140605 |
| 20     | 1.271323 | 6.966178 |
| 21     | 1.270041 | 7.210002 |
| 22     | 1.314032 | 7.277472 |
| 23     | 1.279537 | 7.210021 |
| 24     | 1.259157 | 7.132759 |
| 25     | 1.299354 | 7.330933 |
| 26     | 1.28239  | 7.261334 |
| 27     | 1.275982 | 6.992564 |
| 28     | 1.27365  | 7.173171 |
| 29     | 1.305417 | 6.991368 |
| 30     | 1.31864  | 7.217506 |
| 31     | 1.322156 | 7.279828 |
| 32     | 1.369753 | 7.019694 |
| 33     | 1.378253 | 7.802652 |
| 34     | 1.359389 | 7.469339 |
| 35     | 1.295083 | 7.173016 |
| 36     | 1.275263 | 7.005784 |
| 37     | 1.268523 | 7.026417 |
| 38     | 1.424984 | 7.04964  |
| 39     | 1.28359  | 6.973641 |
| 40     | 1.274966 | 7.113659 |
| 41     | 1.316547 | 7.400913 |

|    |          |          |
|----|----------|----------|
| 42 | 1.383754 | 7.052124 |
| 43 | 1.35928  | 6.996058 |
| 44 | 1.287672 | 6.898945 |
| 45 | 1.256065 | 7.129129 |
| 46 | 1.268836 | 7.249044 |
| 47 | 1.266316 | 7.129576 |
| 48 | 1.275317 | 7.132141 |
| 49 | 1.310189 | 7.415701 |
| 50 | 1.315226 | 6.889865 |
| 51 | 1.273873 | 7.11763  |
| 52 | 1.274753 | 7.002339 |
| 53 | 1.296279 | 7.365803 |
| 54 | 1.278255 | 7.112611 |
| 55 | 1.286419 | 7.198528 |
| 56 | 1.343172 | 7.609222 |
| 57 | 1.347636 | 7.758152 |
| 58 | 1.419454 | 7.061895 |
| 59 | 1.261363 | 7.048117 |
| 60 | 1.271816 | 7.283846 |
| 61 | 1.264752 | 7.023352 |
| 62 | 1.345568 | 7.679196 |
| 63 | 1.264431 | 7.170231 |
| 64 | 1.3009   | 6.990003 |
| 65 | 1.267895 | 7.161178 |
| 66 | 1.26639  | 7.155465 |
| 67 | 1.369801 | 7.762045 |
| 68 | 1.320844 | 6.968169 |
| 69 | 1.337192 | 7.602895 |
| 70 | 1.357721 | 6.930213 |
| 71 | 1.28545  | 7.050087 |
| 72 | 1.263497 | 7.025104 |
| 73 | 1.475342 | 8.120841 |
| 74 | 1.269504 | 7.000092 |
| 75 | 1.538556 | 8.540853 |
| 76 | 1.293332 | 7.256384 |
| 77 | 1.322727 | 7.409595 |
| 78 | 1.260749 | 7.044186 |
| 79 | 1.277209 | 7.328699 |
| 80 | 1.297907 | 6.9675   |
| 81 | 1.262611 | 6.941225 |
| 82 | 1.260993 | 7.091926 |
| 83 | 1.28397  | 6.978943 |
| 84 | 1.33735  | 6.972438 |
| 85 | 1.271859 | 7.205084 |
| 86 | 1.27148  | 7.028443 |

|     |          |          |
|-----|----------|----------|
| 87  | 1.338339 | 7.400482 |
| 88  | 1.262129 | 7.176164 |
| 89  | 1.27725  | 6.911622 |
| 90  | 1.272559 | 6.962362 |
| 91  | 1.284783 | 6.98869  |
| 92  | 1.2911   | 7.27655  |
| 93  | 1.664811 | 8.869362 |
| 94  | 1.484787 | 8.168915 |
| 95  | 1.261334 | 7.125813 |
| 96  | 1.365273 | 6.989765 |
| 97  | 1.256294 | 7.086614 |
| 98  | 1.257312 | 7.097563 |
| 99  | 1.299519 | 7.3769   |
| 100 | 1.27778  | 6.961551 |
